# Supplementary material
Source: publisher figshare collection journal article supplement (https://acs.figshare.com/ndownloader/files/4770025)
Supplement: Supplementary file 1 [file 4770025]

## Supporting Information

### Templating Photodimerization of Coumarins Within a Water Soluble Nano Reaction-Vessel

S. Karthikeyan and V. Ramamurthy\*

Department of Chemistry, University of Miami, Coral Gables, FL 33124, USA

[murthy1@miami.edu](mailto:murthy1@miami.edu)

#### Contents

|                                                                                                                                                                    |    |
|--------------------------------------------------------------------------------------------------------------------------------------------------------------------|----|
| 1. <sup>1</sup> H NMR characterization of the dimers.                                                                                                              | S2 |
| 2. <sup>1</sup> H NMR spectra of <b>1c</b> in D <sub>2</sub> O and in the presence of Pd- nanocage (Figure S1).                                                    | S3 |
| 3. <sup>1</sup> H NMR spectra of <b>1d</b> in D <sub>2</sub> O and in the presence of Pd-nanocage (Figure S2).                                                     | S4 |
| 4. <sup>1</sup> H NMR spectra showing the cyclobutane region of the dimer obtained upon irradiation of <b>1a</b> in water and as a host-guest complex (Figure S3). | S5 |
| 5. <sup>1</sup> H NMR spectra showing the cyclobutane region of the dimer obtained upon irradiation of <b>1b</b> in water and as a host-guest complex (Figure S4). | S6 |

## **<sup>1</sup>H NMR characterization of the dimers**

The regiochemistry of the dimers was assigned based on the chemical shift of the cyclobutane protons reported in the literature.

***Syn head-head (2a) dimer of 1a:*** <sup>1</sup>H NMR (CDCl<sub>3</sub>) δ: 4.05-4.1(m, 2H), 4.2-4.25(m, 2H), 6.76-6.8(d, 2H), 6.85-6.95(m, 4H), 7.2-7.24(m, 2H).

***Syn head-tail (3a) dimer of 1a:*** <sup>1</sup>H NMR (CDCl<sub>3</sub>) δ: 4.25(m, 4H), 6.6-6.65(m, 2H), 6.9-7.0(m, 2H), 7.2-7.4(m, 4H).

***Syn head-head (2b) dimer of 1b:*** <sup>1</sup>H NMR (CDCl<sub>3</sub>) δ: 2.15(s, 6H, -CH<sub>3</sub>), 4.0-4.05(m, 2H), 4.1-4.15(m, 2H), 6.55(d, 2H), 6.75(d, 2H, J=8.0 Hz), 7.0(m, 2H).

***Anti head-head (4b) dimer of 1b:*** <sup>1</sup>H NMR (CDCl<sub>3</sub>) δ: 2.35(s, 6H, -CH<sub>3</sub>), 3.78-3.80(m, 2H), 3.9-3.92(m, 2H), 6.95(d, 2H), 7.0(d, 2H, J=8.0 Hz), 7.15(m, 2H).

***Syn head-head (2c) dimer of 1c:*** <sup>1</sup>H NMR (CDCl<sub>3</sub>) δ: 3.75(s, 6H, -OCH<sub>3</sub>), 3.99-4.02(m, 2H), 4.06-4.09(m, 2H), 6.43(d, 2H), 6.51-6.54(m, 2H), 6.7(d, 2H, J=8.0 Hz).

***Syn head-tail (3c) dimer of 1c:*** <sup>1</sup>H NMR (CDCl<sub>3</sub>) δ: 3.7(s, 6H, -OCH<sub>3</sub>), 4.15-4.2(m, 2H), 4.22-4.28(m, 2H), 6.2(d, 2H), 6.65-6.72(m, 2H), 7.05(d, 2H, J=8.3 Hz).

***Syn head-head (2d) dimer of 1d:*** <sup>1</sup>H NMR (CDCl<sub>3</sub>) δ: 3.8(s, 6H, -OCH<sub>3</sub>), 4.01-4.05(m, 2H), 4.19-4.21(m, 2H), 6.38-6.40(d, 2H, J=7 Hz), 6.78-6.80(d, 2H, J=8 Hz), 6.85-6.95(m, 2H).

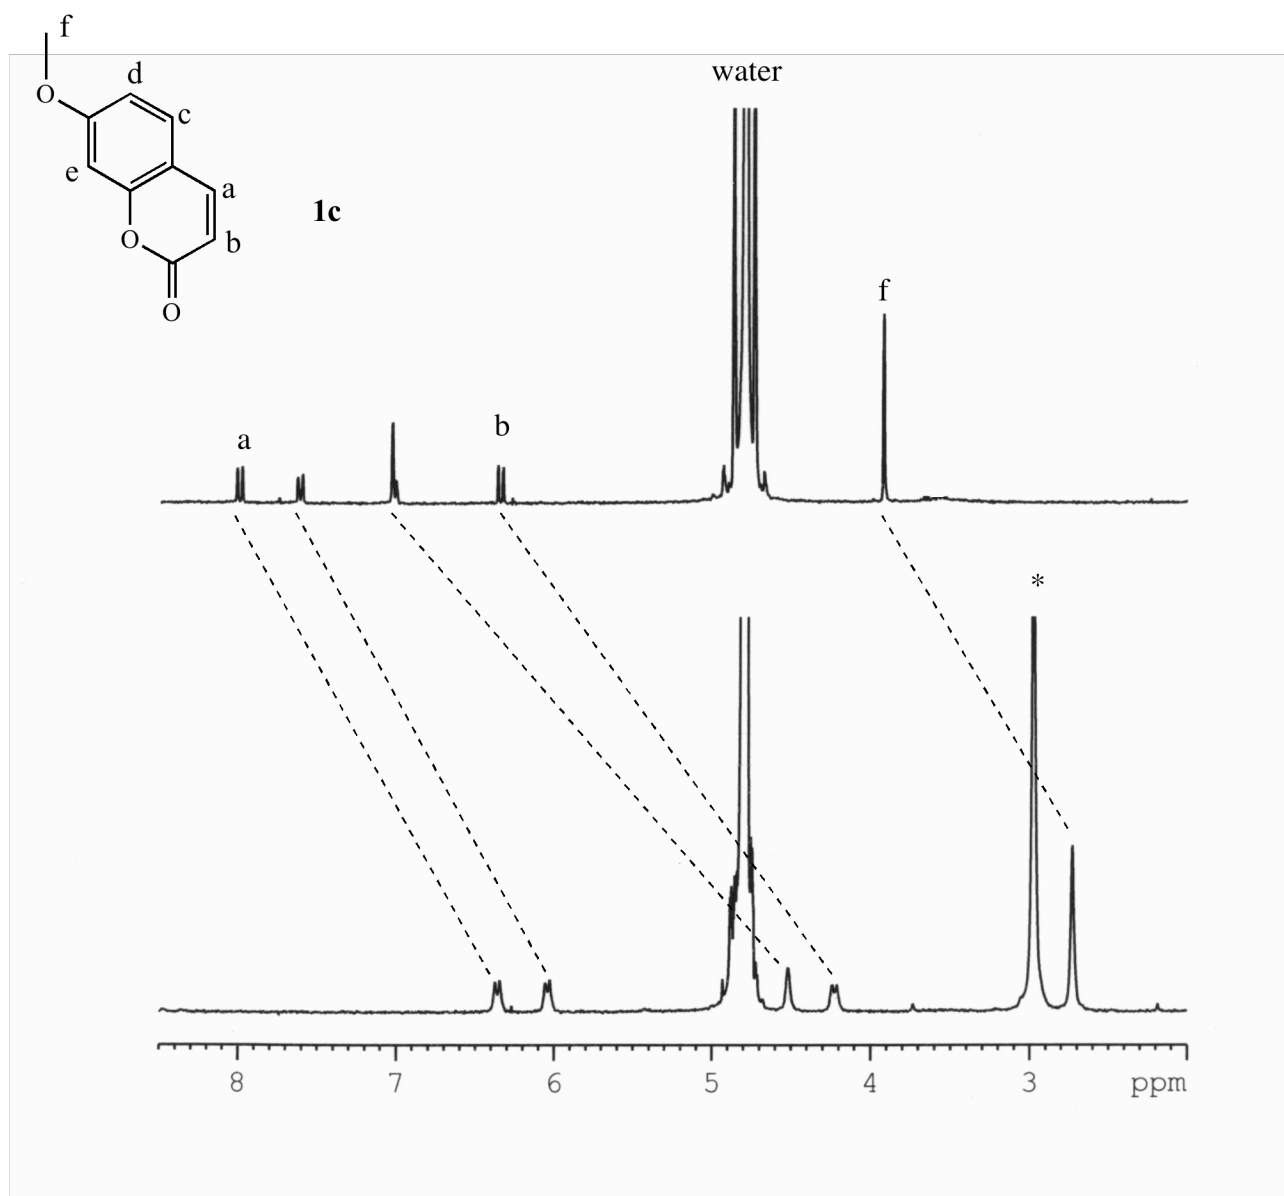

**Figure S1**  $^1\text{H}$  NMR ( $\text{D}_2\text{O}$ ) spectra of **1c** in the absence (top) and in the presence of 0.5 equivalents of Pd-nanocage (bottom). The Pd-nanocage signal is indicated by \*.

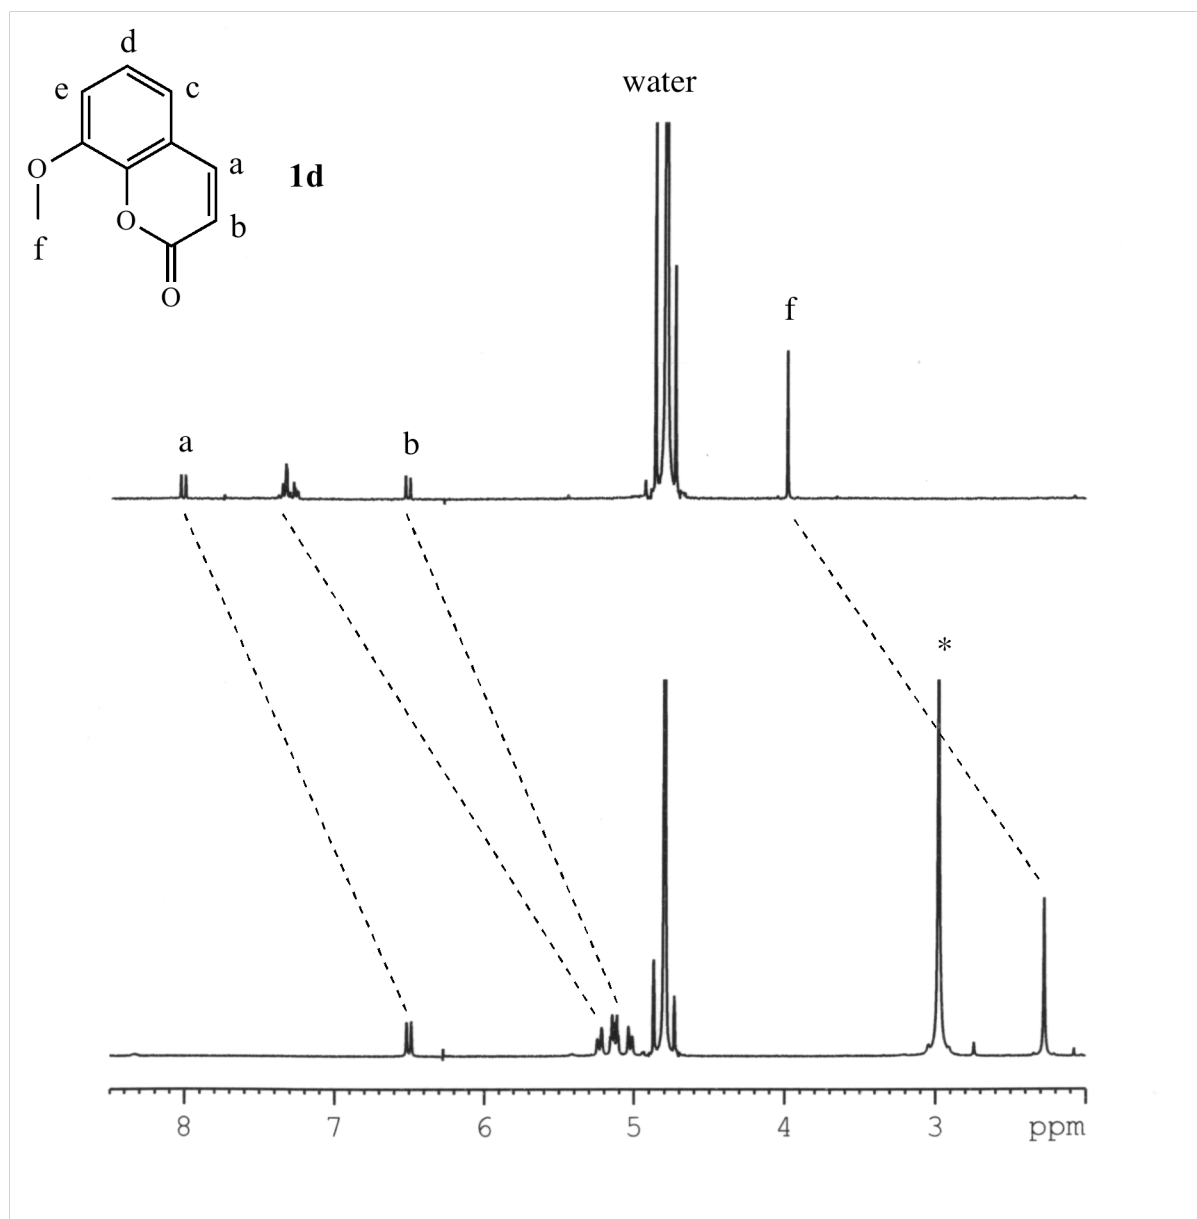

**Figure S2**  $^1\text{H}$  NMR ( $\text{D}_2\text{O}$ ) spectra of **1d** in the absence (top) and in the presence of 0.5 equivalents of Pd-nanocage (bottom). The Pd-nanocage signal is indicated by \*.

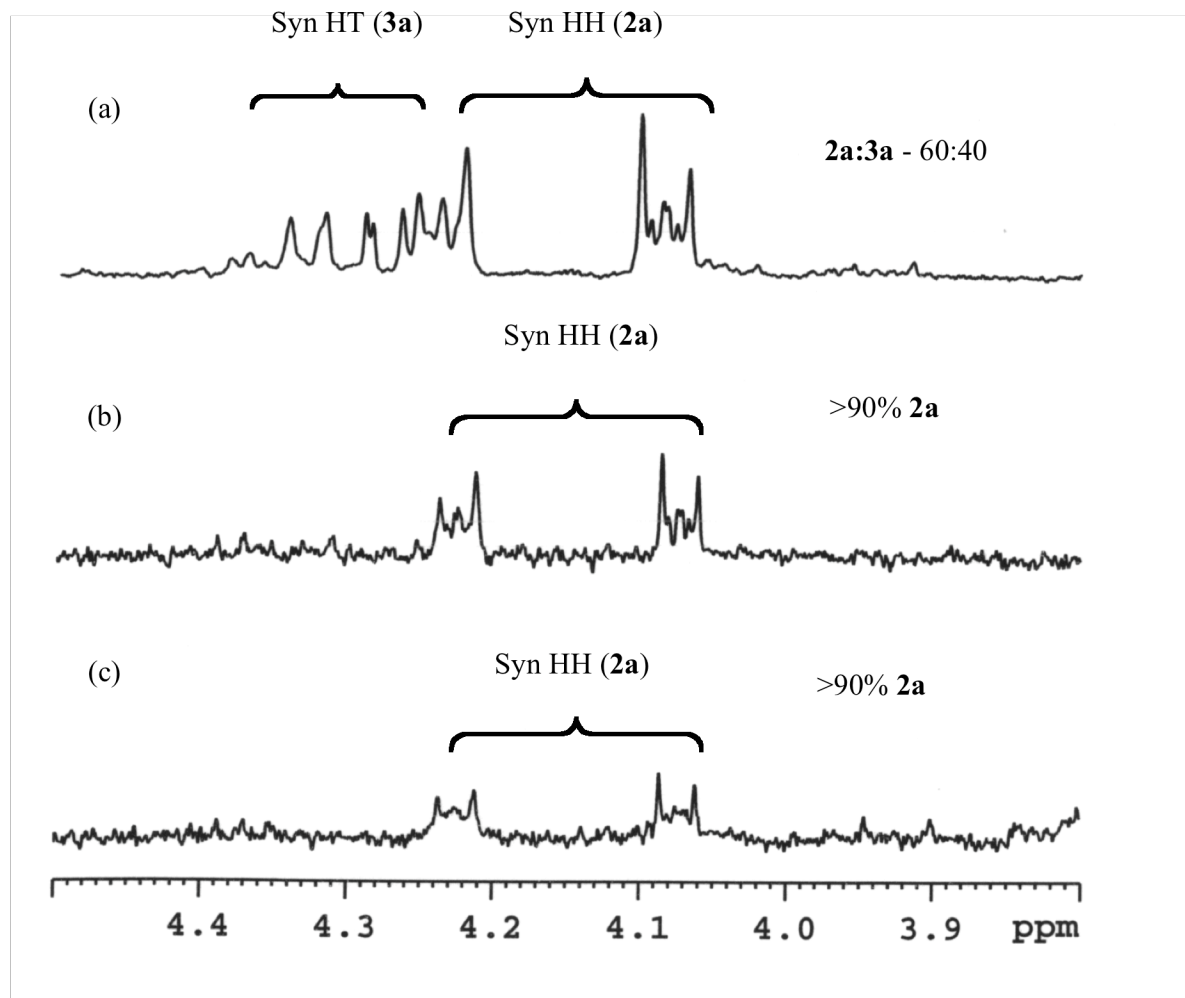

**Figure S3**  $^1\text{H}$  NMR ( $\text{CDCl}_3$ ) spectra showing the cyclobutane region of the dimer obtained upon irradiation of **1a** in (a) water and as a host-guest complex having H:G ratios of (b) 1:6 and (c) 1:2.

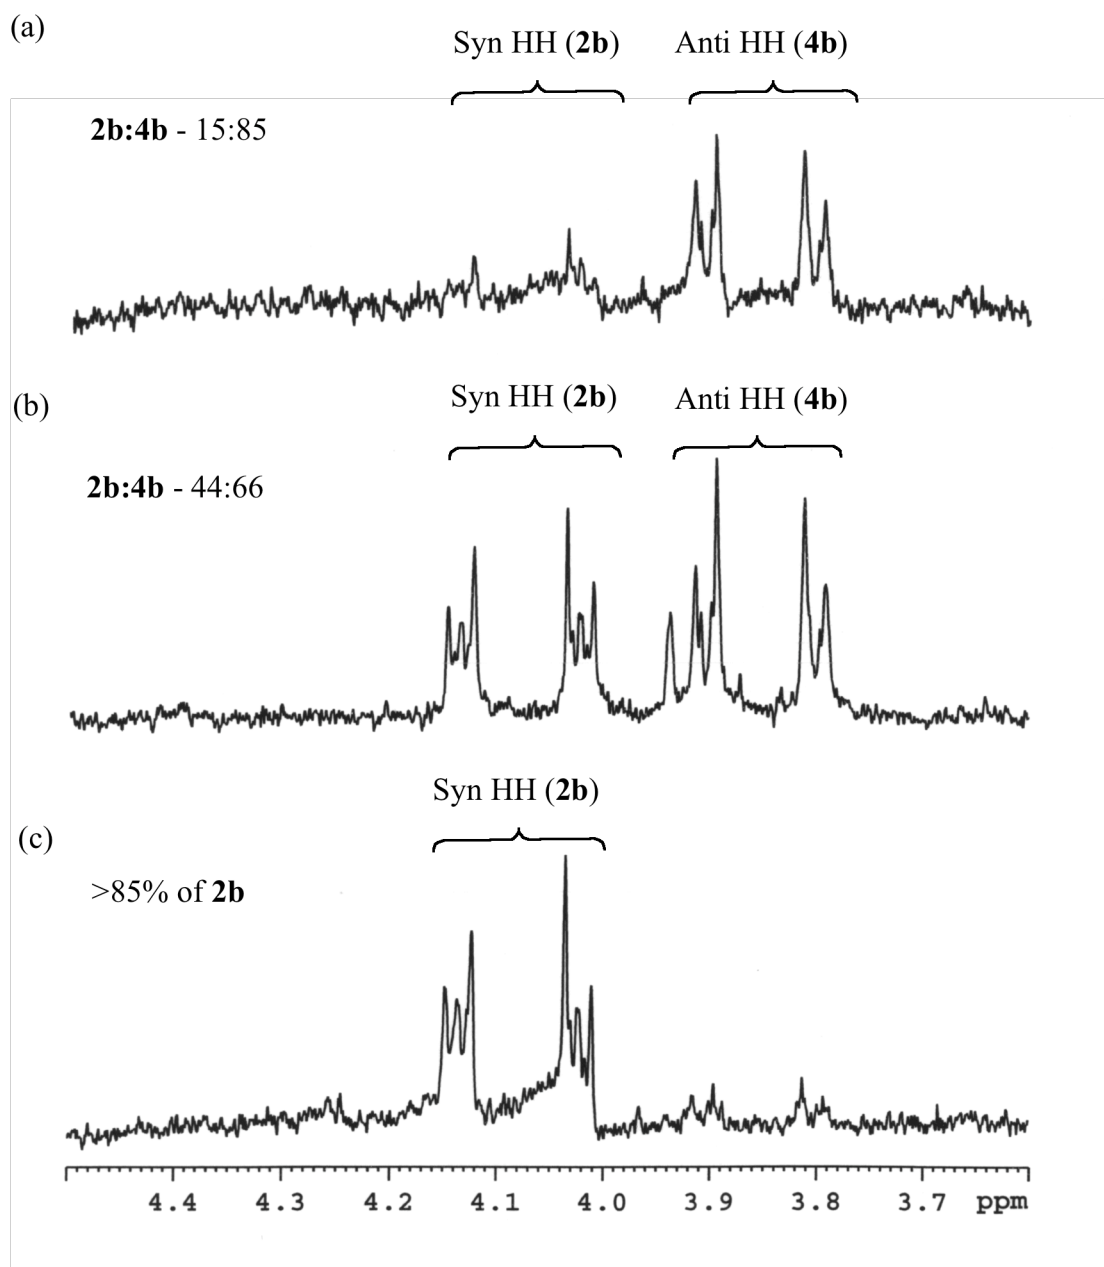

**Figure S4**  $^1\text{H}$  NMR ( $\text{CDCl}_3$ ) spectra showing the cyclobutane region of the dimer obtained upon irradiation of **1b** in (a) water and as a host-guest complex having H:G ratios of (b) 1:6 and (c) 1:2.
